# Supplementary material for: High mobility group box 1 antagonist limits metastatic seeding in the lungs via reduction of cell–cell adhesion
Source: PubMed Central journal article supplement (PMC5464821; doi:10.18632/oncotarget.16188), 2017-03-14
Supplement: oncotarget-08-32706-s001.pdf [file oncotarget-08-32706-s001.pdf]

## High mobility group box 1 antagonist limits metastatic seeding in the lungs via reduction of cell-cell adhesion

### Supplementary Materials

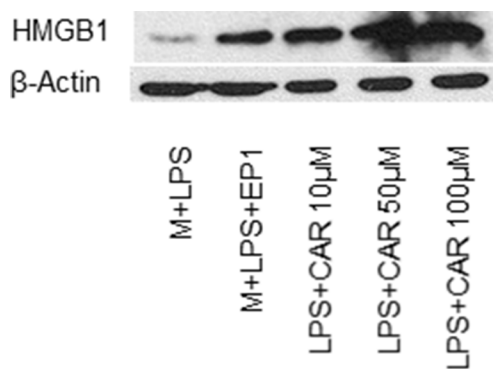

**Supplementary Figure 1: Carbenoxolone inhibits LPS-induced HMGB1 secretion: Western blot analysis of Carbenoxolone activation using LPS activation assay.** LPS activated Macrophages (M) were incubated with EPI-1 as positive control.

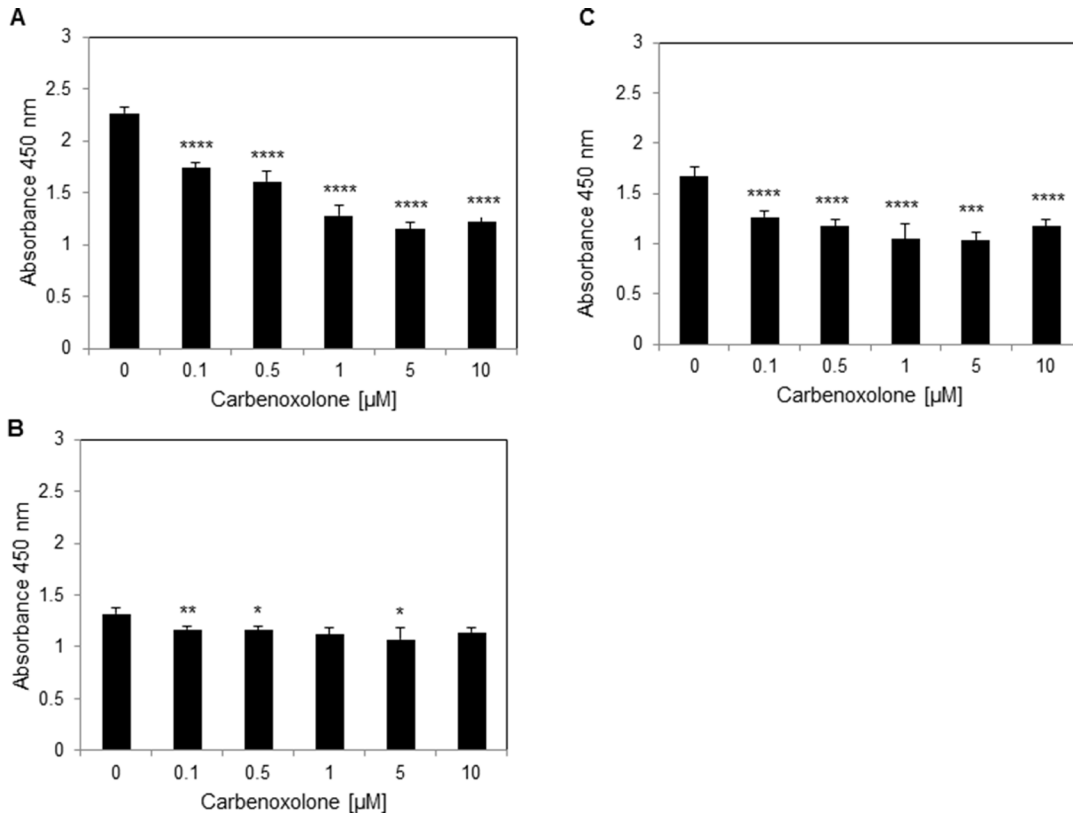

**Supplementary Figure 2: Carbenoxolone affects proliferation in different cell lines.** Cell proliferation of (A) A-375 (B) LLC and (C) NIH/3T3 cell lines after 72 hours of incubation with Carbenoxolone.  $n = 12$ . \* $p \leq 0.05$ , \*\* $p \leq 0.01$ , \*\*\* $p \leq 0.001$ , \*\*\*\* $p \leq 0.0001$ .

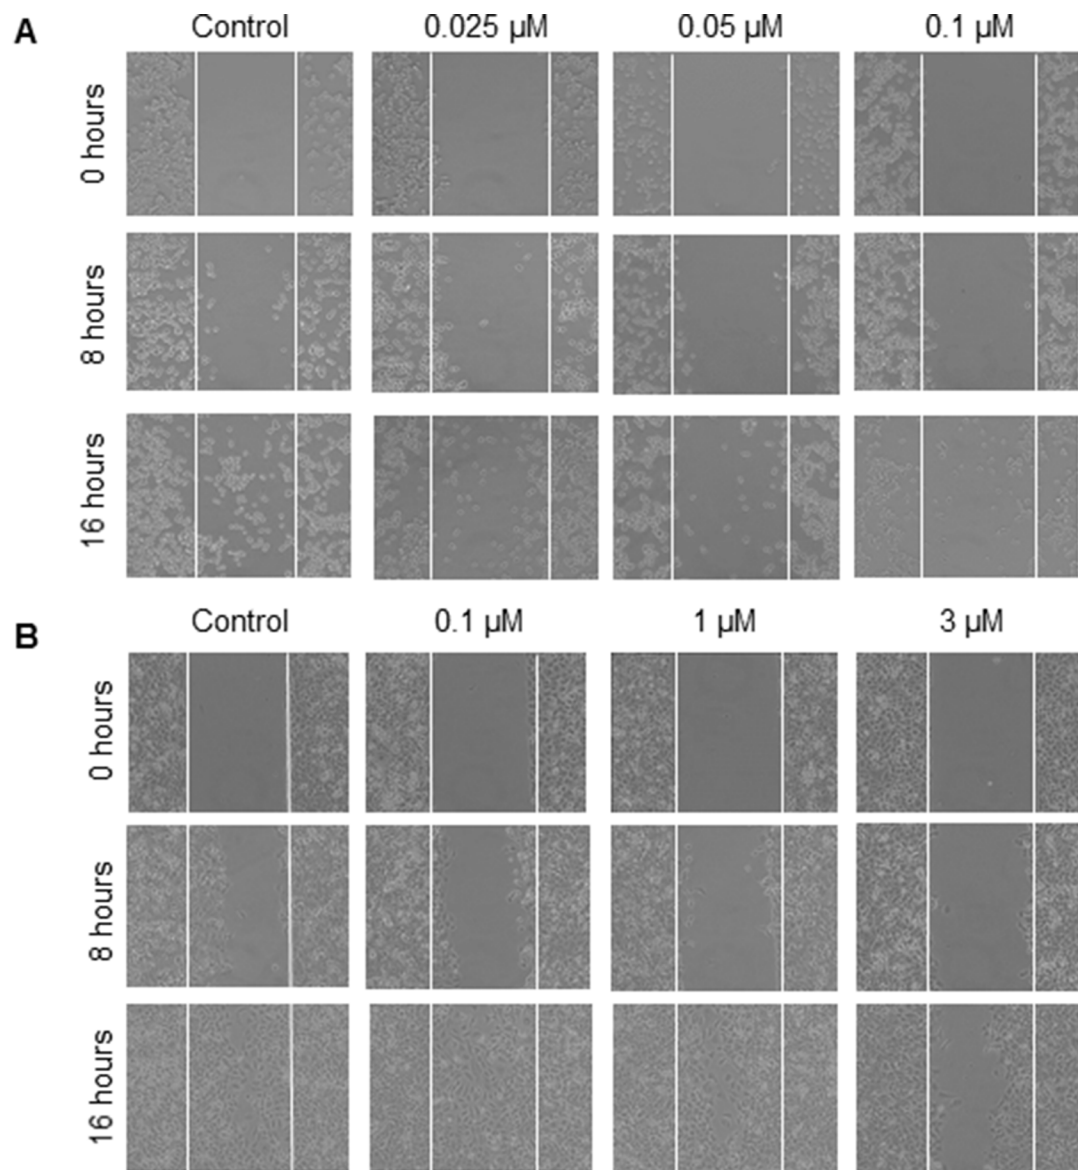

**Supplementary Figure 3: Effect of Carbenoxolone on cell migration.** Wound healing of (A) LLC and (B) MDA-MB-231 at t0 and post 8 and 16 hours of incubation with Carbenoxolone, with different drug concentration. White thin lines represent the scratch area.  $n = 3$ .

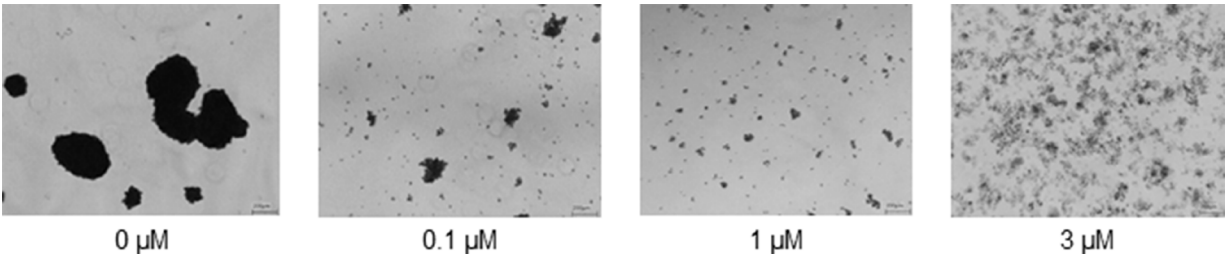

**Supplementary Figure 4: Carbenoxolone increases cells' susceptibility to anoikis.** Anoikis assay using LLC incubated for 72 hours Carbenoxolone. 100K cells were seeded on p-HEMA coated plates, and cell viability was measured using WST8 with absorbance detected at 450nm using a plate reader.  $n = 6$ .

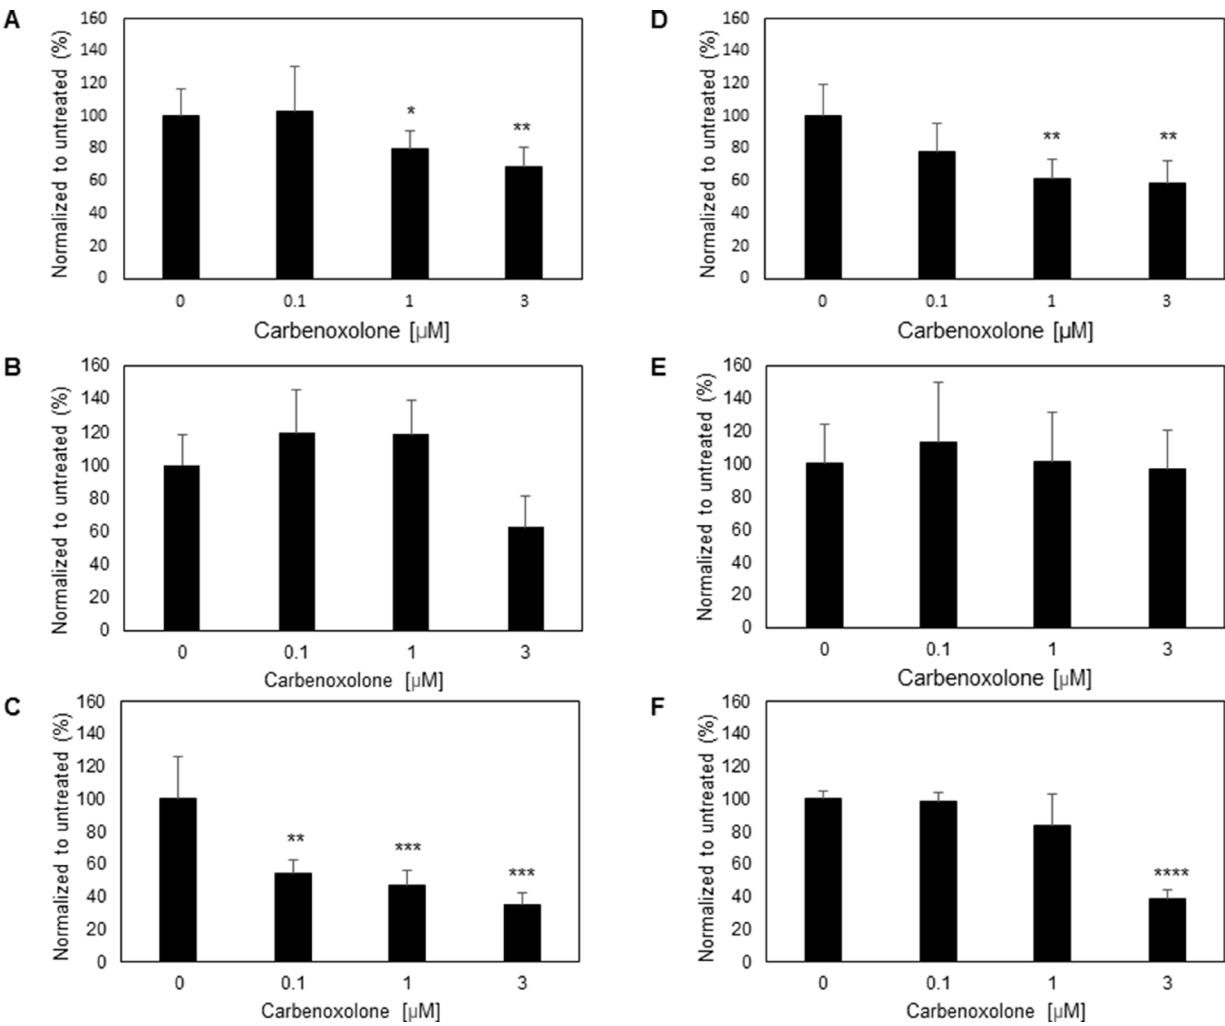

**Supplementary Figure 5: Collagen is the most affected ECM component resulting Carbenoxolone treatment.** Adhesion assay of LLC on plates coated with varying extra cellular matrix components post incubated with Carbenoxolone for 1 hour. Results were normalized compared to the untreated cells of the (A) uncoated plate. Coatings were of (B) fibronectin (C) collagen (D) Laminin (E) Elastin and (F) Gelatin.  $n = 6$ . \* $p \leq 0.05$ , \*\* $p \leq 0.01$ , \*\*\* $p \leq 0.001$ , \*\*\*\* $p \leq 0.0001$ .

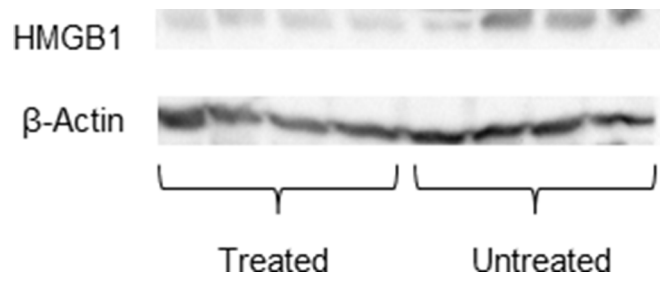

**Supplementary Figure 6: Carbenoxolone lowers level of HMGB1 in tumors of treated mice.** Level of HMGB1 in tumors of either treated by Carbenoxolone or untreated mice.  $n = 4$ .

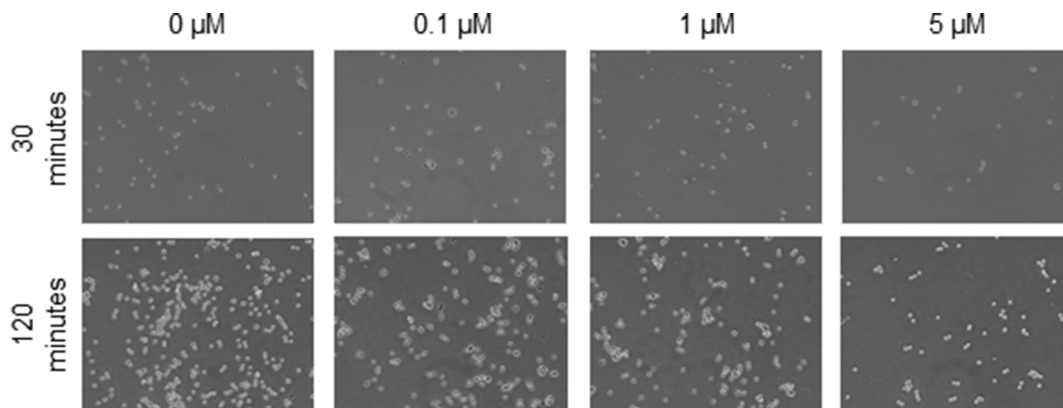

**Supplementary Figure 7: Carbenoxolone has a concentration dependent effect on LLC cells.** Adhesion of LLC cells on uncoated culture plates, post 30 and 120 min of incubation with Carbenoxolone.  $n = 6$ .
